# Supplementary material
Source: publisher figshare collection journal article supplement (https://karger.figshare.com/ndownloader/files/31083715)
Supplement: Supplementary file 1 [file 31083715]

## Supplementary material

Clinical images per phenotype (Written informed consent to use the photos for publication was obtained from each patient.)

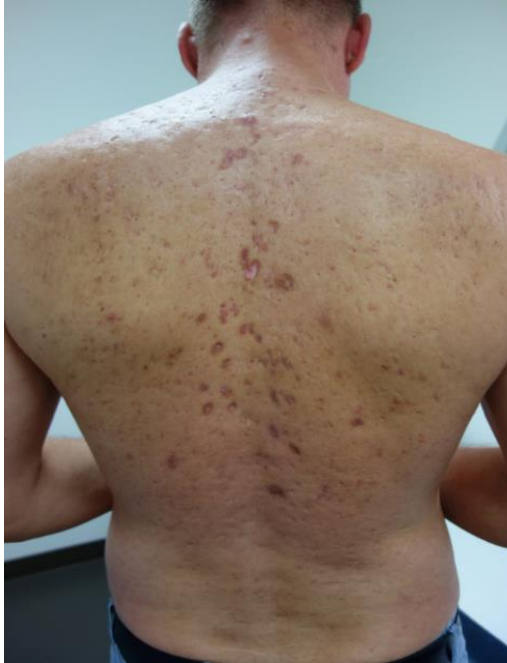

*Conglobata type*: Cysts and comedones on the neck and back of a male patient.

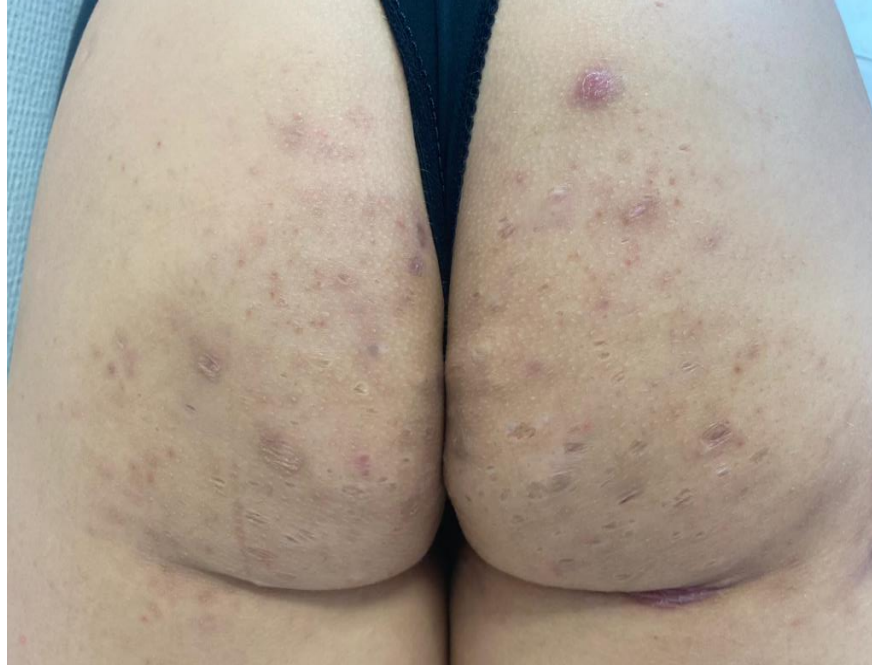

*Scarring folliculitis*: Icepick and boxcar scars with superficial pustules and nodules on the buttocks of a female patient.

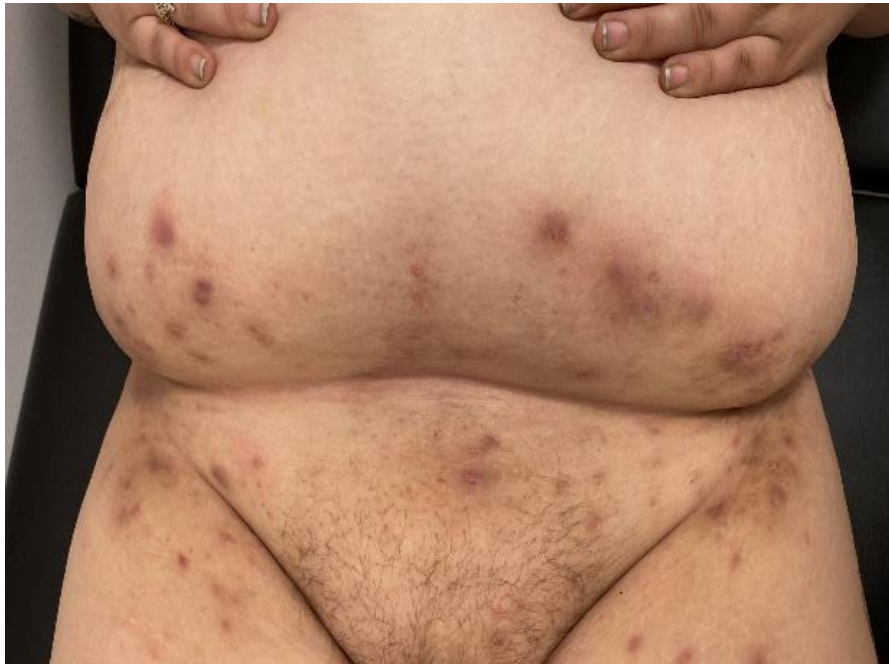

*Frictional furunculoid*: Nodules and abscesses in extensive skinfolds exposed to friction in an obese patient.
